# Supplementary material for: Morphology and Molecules Reveal Unexpected Cryptic Diversity in the Enigmatic Genus Sinobirma Bryk, 1944 (Lepidoptera: Saturniidae)
Source: PubMed Central journal article supplement (PMC3446977; doi:10.1371/journal.pone.0043920), 2012-09-19

Fig. S11 - 28S rRNA sequence alignment

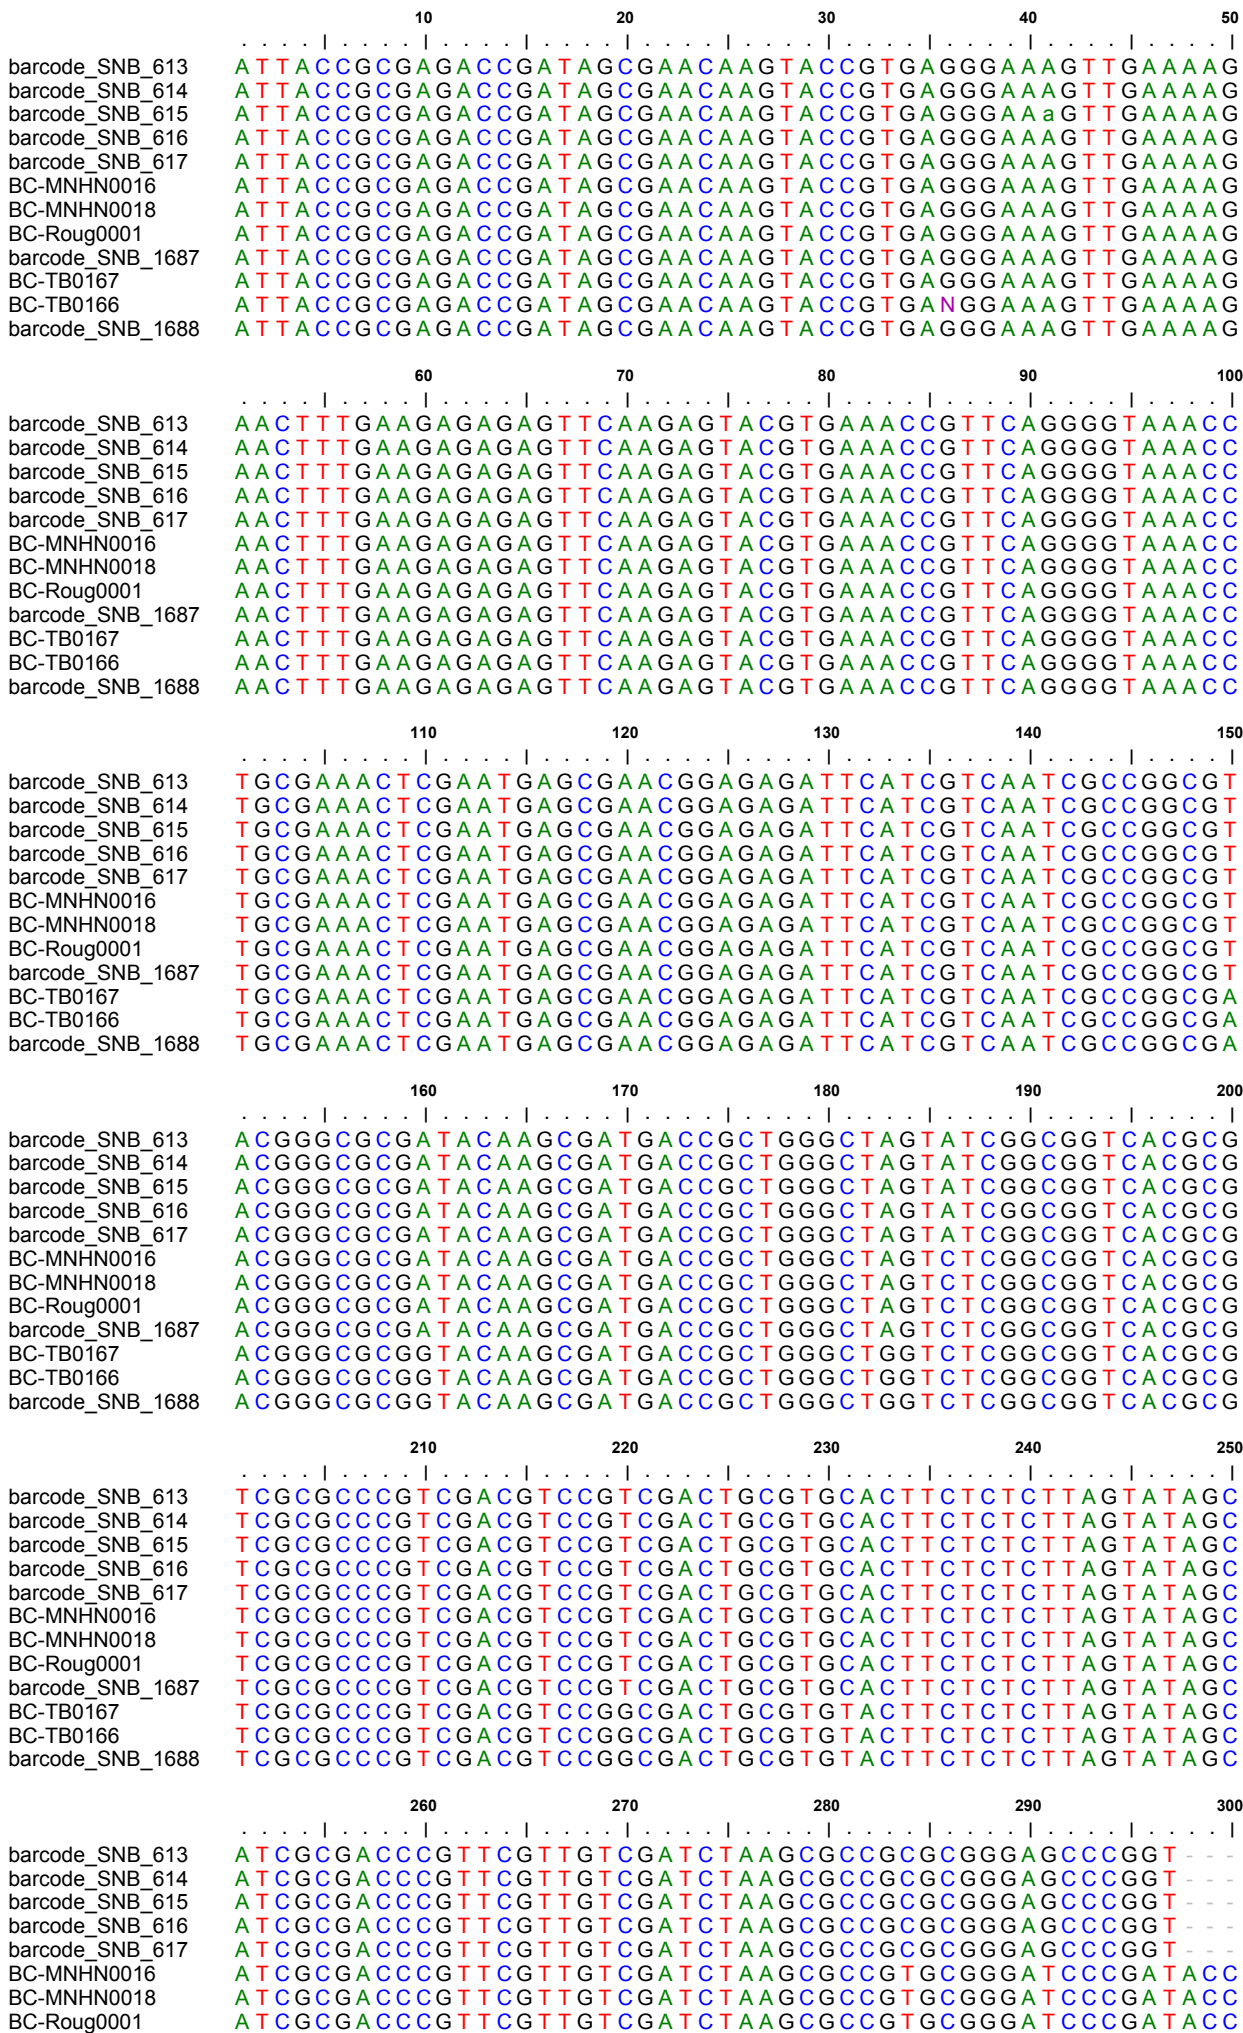

Supplement: pone.0043920.s001.pdf [file pone.0043920.s001.pdf]
